# Supplementary material for: SORT1/LAMP2-mediated extracellular vesicle secretion and cell adhesion are linked to lenalidomide resistance in multiple myeloma
Source: PubMed Central journal article supplement — Blood Adv. 2022 Apr 18;6(8):2480–95. doi: 10.1182/bloodadvances.2021005772 (PMC9043942; doi:10.1182/bloodadvances.2021005772), 2022-04-18

## Supplemental Figure Legends

**Supplemental Figure 1. Characterization of lenalidomide-resistant MM cells.** (A) Pictures of the 6 cell lines used in this study. The insets show higher-magnification images of KMS21 and KMS21R cells. Scale bar: 50  $\mu\text{m}$ . (B) Cell viability assay of KMS34 and KMS34R cells in the presence of lenalidomide. The values were normalized to those of the negative control. (C). Caspase activity in KMS34 and KMS34R cells in the presence of lenalidomide, as measured with a caspase3/7 assay kit. (D) Picture of the MM cells on FN-coated glasses. Scale bar: 100  $\mu\text{m}$ . Blue: Hoechst 33342 indicating nucleus; Red: CD138-positive MM cells. (E) Picture of the MM cells co-cultured with BMSCs. Scale bar: 50  $\mu\text{m}$ . Blue: Hoechst 33342 indicating nucleus; Red: CD138-positive MM cells. CD138-negative cells are considered as BMSCs. (F) The adherent cell numbers in the FN-coated or BMSC-cocultured. \*,  $p < 0.05$ .

**Supplemental Figure 2. Enriched pathways in lenalidomide-resistant cell lines.** (A) GSEA (resistant (KMS21R and KMS27R) vs. parental (KMS27 and KMS21)) results showing the significantly enriched pathways in resistant cell lines. NES: normalized enrichment score. (B) A heatmap of the cell adhesion-related genes highly expressed in resistant cells. (C) A heatmap of the JAK/STAT pathway-related genes highly expressed in resistant cells.

**Supplemental Figure 3. Characterization of MM cell-derived EVs.** (A) Nanoparticle tracking analysis showing the particle size of MM cell-derived EVs. The vertical axis in the graphs shows the number of EVs ( $\times 10^8$ )/mL, and the horizontal axis indicates the particle size (nm) of EVs. (B) Western blot analysis of the typical EV marker proteins in MM cell-derived EVs. The proteins were loaded at 500 ng/lane.

**Supplemental Figure 4. Coculture of parental cells with resistant cells.** (A) Cell viability assay in parental cells. The values were normalized to those of the negative control. The error bars indicate the s.d. values. \*,  $p < 0.05$ . Parental cells (KMS21, KMS27) were cocultured with KMS21R and KMS27R cells. (B) The number of the adherent cells

after co-culture. \*,  $p < 0.05$ . (C) KMS21 and KMS27 cell lines co-cultured with EV-depleted conditioned medium from each resistant cell line.

**Supplemental Figure 5. Pathway analysis of resistant MM cell lines.** (A) Illustration of activated pathways in the resistant cells, generated by IPA software. The orange nodes indicate activated pathways and the blue nodes indicate inhibited pathways in resistant MM cells. (B) Lists of upstream analysis data. Red bars: upregulated, blue bars: downregulated. Downregulated genes downstream (such as IKZF3 and IKZF1) of CRBN, lenalidomide-targeted genes, are marked in red. (C) Heat map showing the expression patterns of the lenalidomide-affected genes.

**Supplemental Figure 6. The relationship of CRBN and LAMP2, SORT1.** (A) public data and (B) our samples. (C) The protein levels of CRBN after knockdown of CRBN. (D) The quantification of the protein levels of CRBN. (E) The morphology of KMS27R cells after CRBN knockdown. Scale bar shows 50  $\mu\text{m}$ . Bar graph shows the adherent cell numbers.  $p < 0.05$ .

**Supplemental Figure 7. Characterization of cells with shRNA-mediated knockdown of LAMP2 and SORT1.** (A) Pictures of lenalidomide-resistant cells after knockdown of LAMP2 or SORT1. Scale bar: 50  $\mu\text{m}$ . (B) Cell viability assay of KMS21R cells with LAMP2 or SORT1 knockdown in the presence of lenalidomide. The values were normalized to those of the negative control (0  $\mu\text{M}$  lenalidomide). The error bars indicate the s.d. values. \*,  $p < 0.05$ . top; normal plate, bottom; FN-coated plate. (C) Western blotting of CRBN, VLA-4, STAT3, p-STAT3,  $\beta$ -actin, after silencing of LAMP2 and SORT1 genes. Protein was loaded at 15  $\mu\text{g}/\text{lane}$ . (D) The expression level of CRBN after silencing LAMP2 and SORT1 genes. (E) Cell viability assay of KMS27R cells after LAMP2 or SORT1 knockdown in normal plates or ultra-low attachment plates. The black bars show the results for the normal plates, and the gray bars show the results for the ultra-low attachment plates.

**Supplemental Figure 8. Value of EV secretion- and cell adhesion-related genes for**

**the prediction of MM patient prognosis.** (A) UMAP plot classifying the patients. Each cluster indicates a different set of MM patients. BM: derived from bone marrow, EM: derived from extramedullary sites. (B) Principal component analysis of the 6 cell lines used in this study. The X-axis indicates the contribution of PC1, and the Y-axis indicates the contribution of PC2. (C) Top 50 genes in the PC1 and PC2 signatures.

**Supplemental Figure 9.** Violin plots of PC2 signature genes among patient states. \*,  $p < 0.05$ , \*\*,  $p < 0.01$ , \*\*\*,  $p < 0.001$

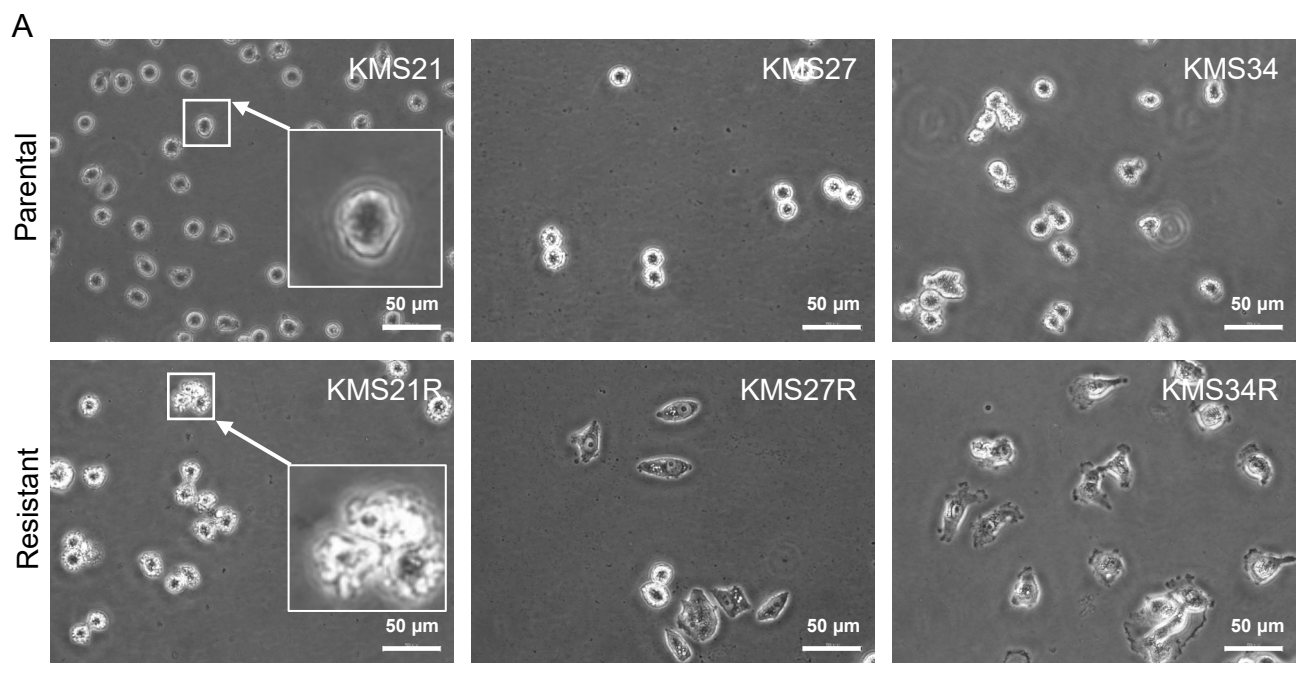

Attached to culture dish

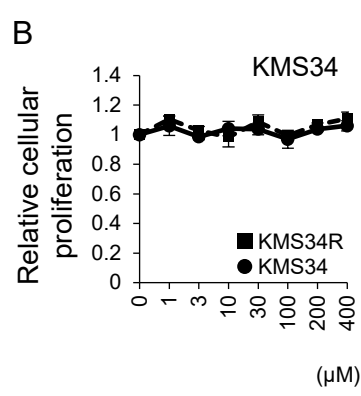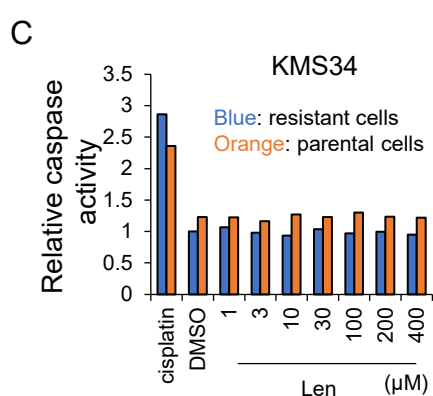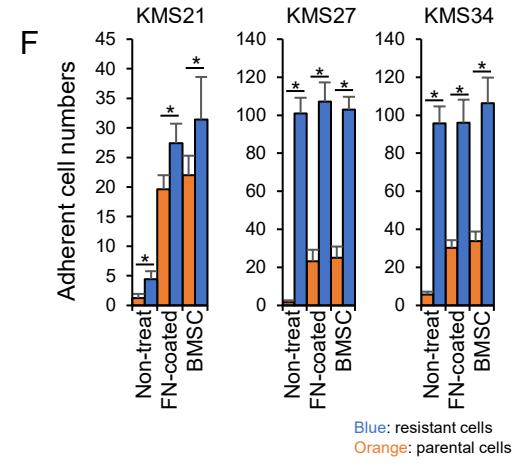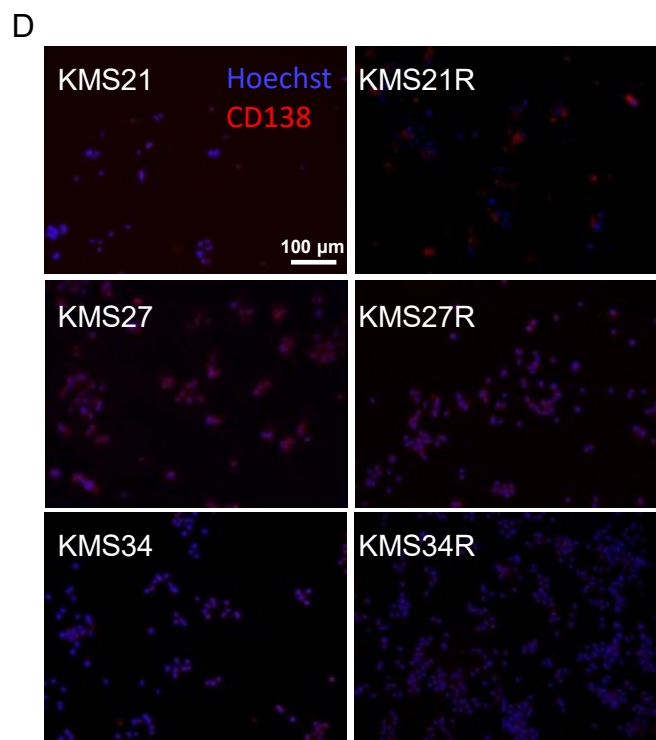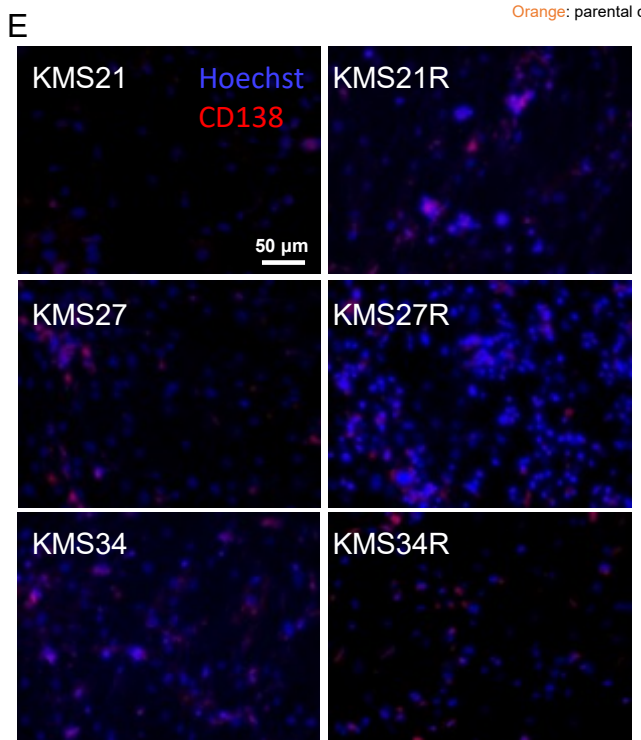

A

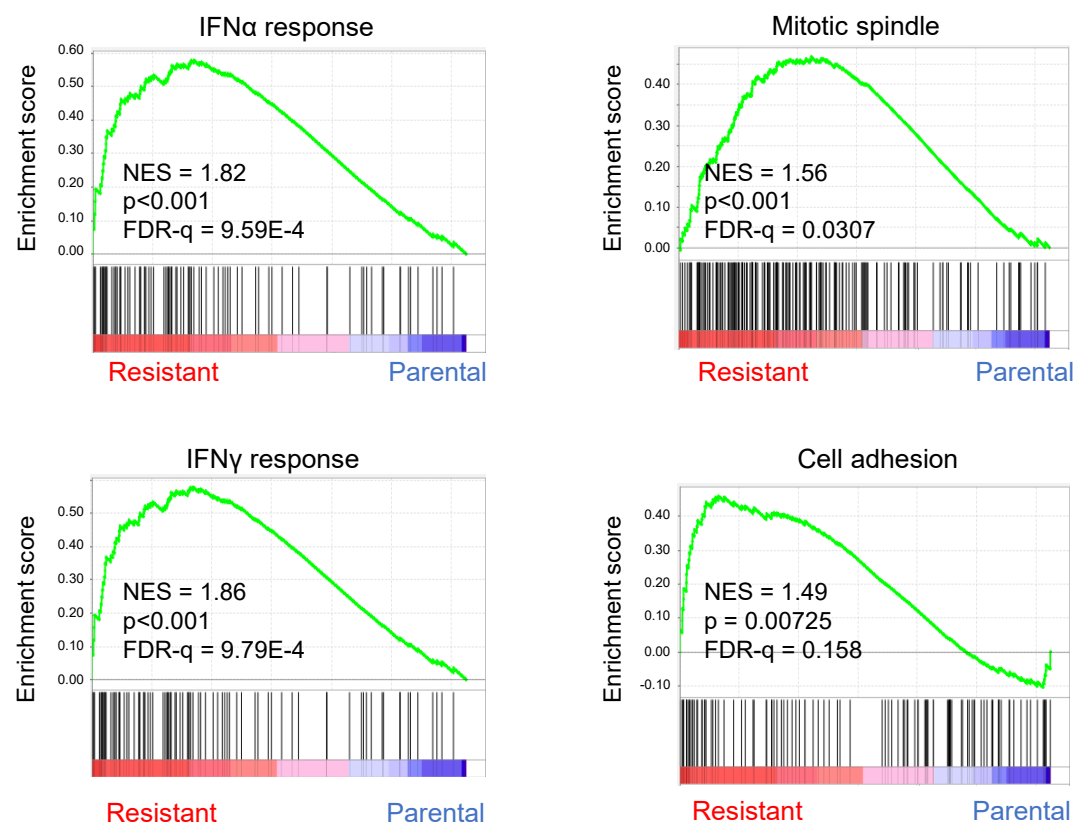

B

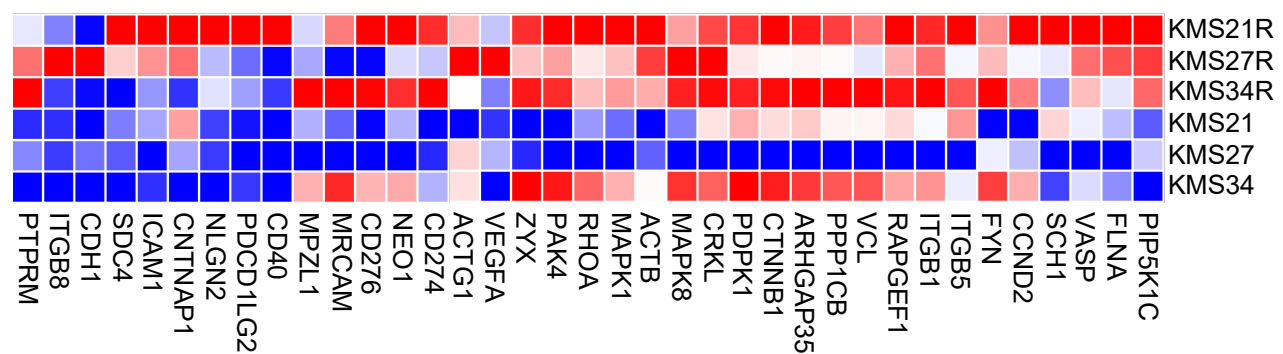

C

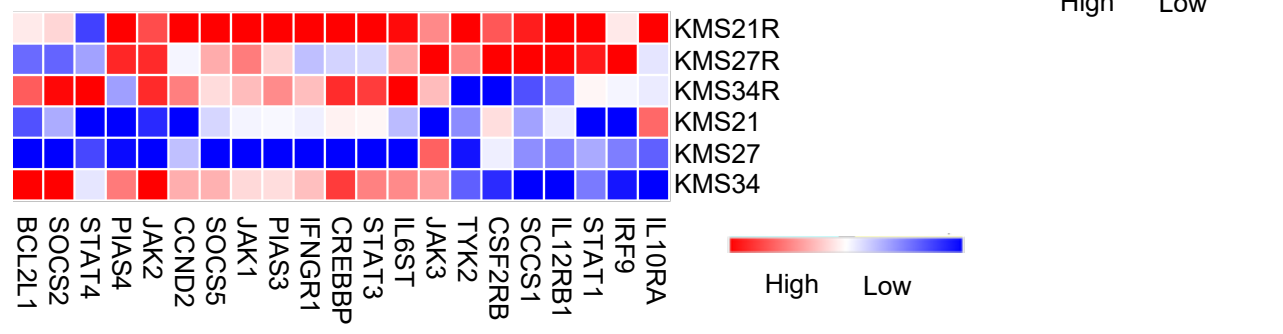

Supplementary Figure 3, Yamamoto T et al.

A

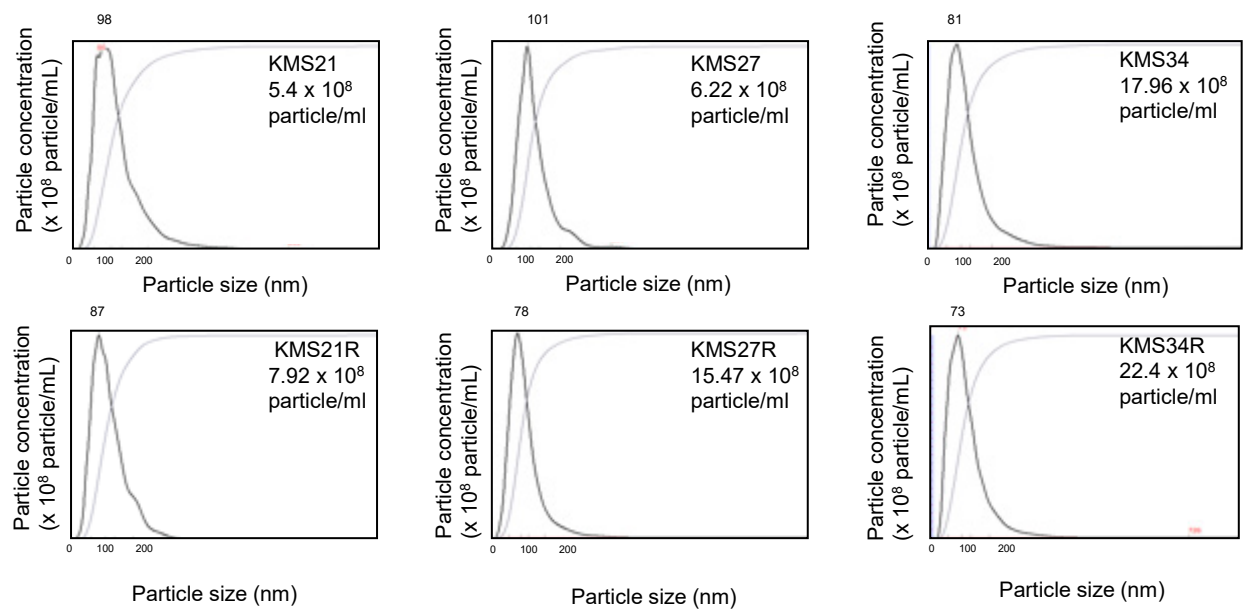

B

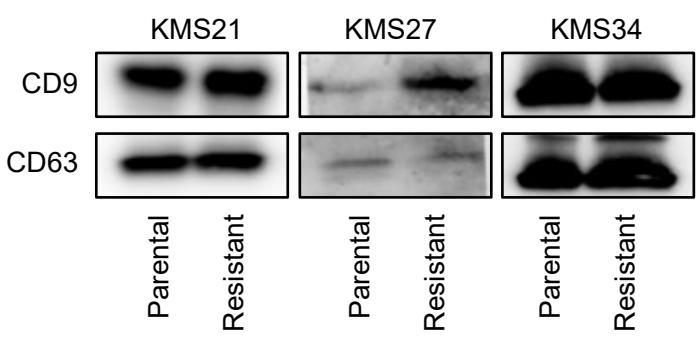

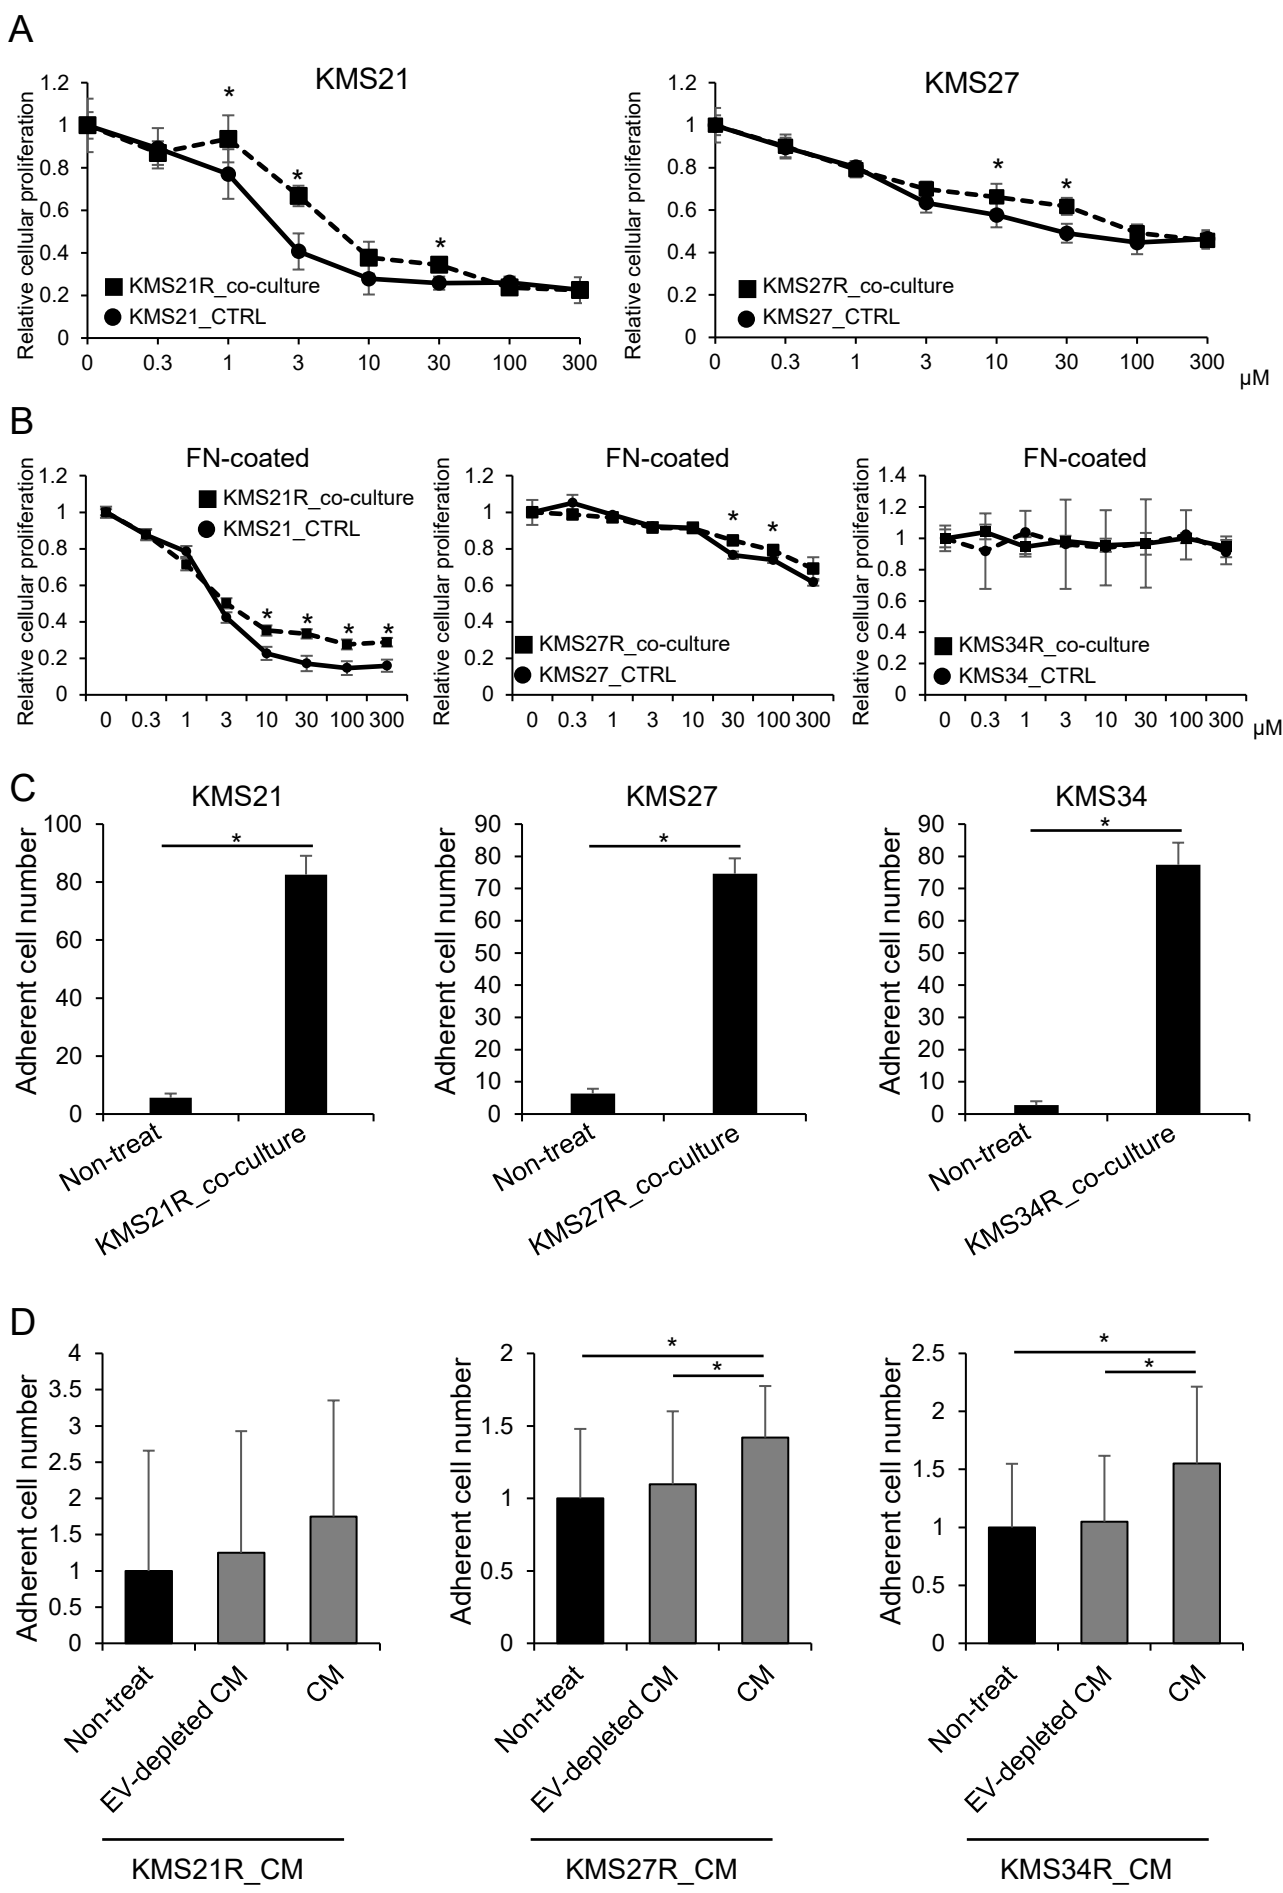

Supplementary Figure 5, Yamamoto T et al.

A

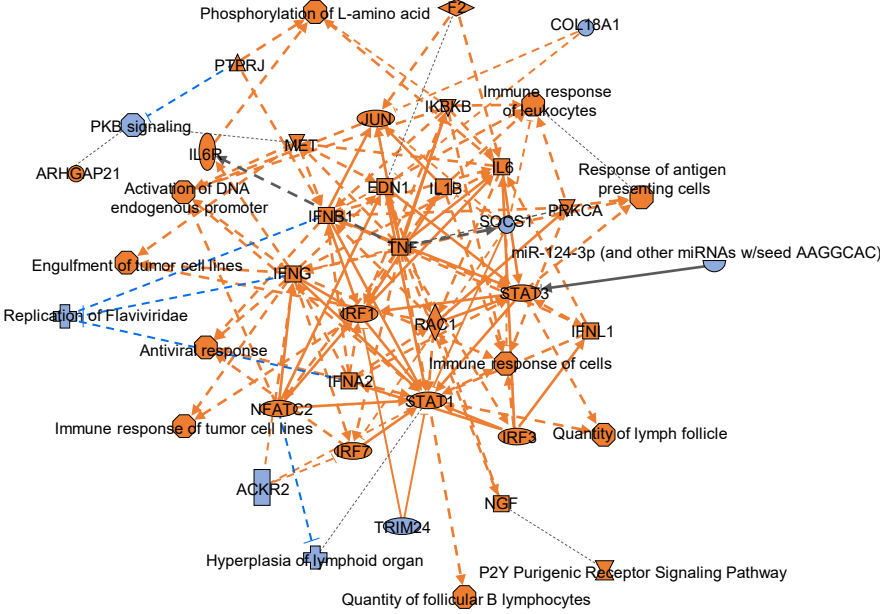

B

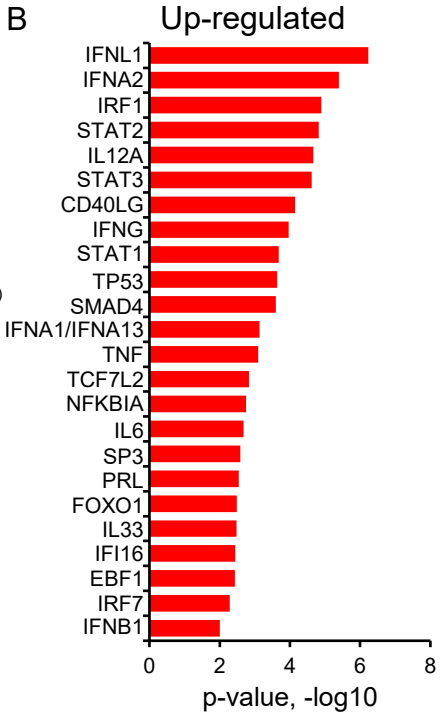

C

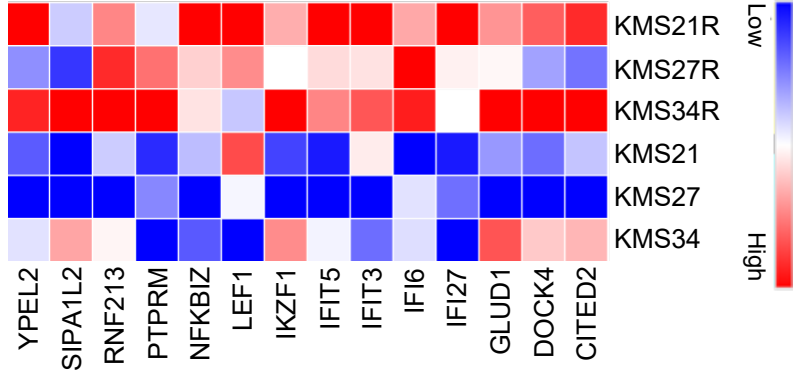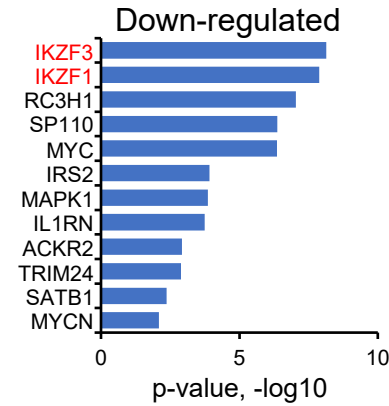



Supplementary Figure 6, Yamamoto T et al.

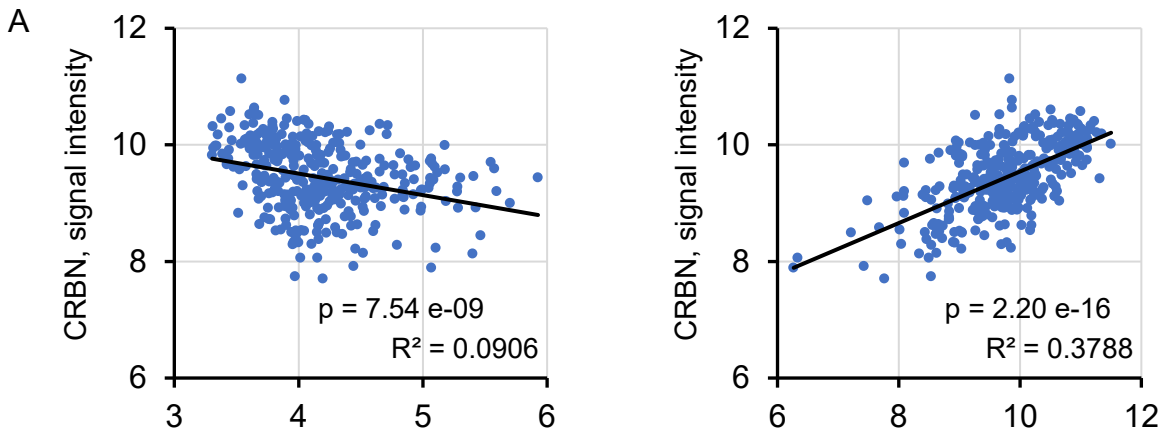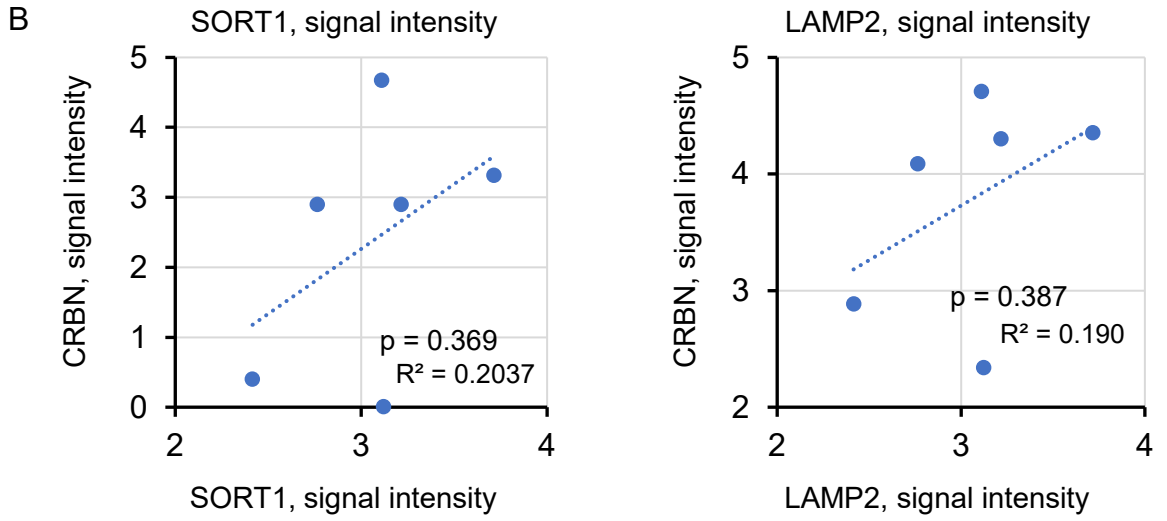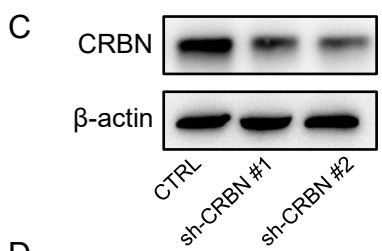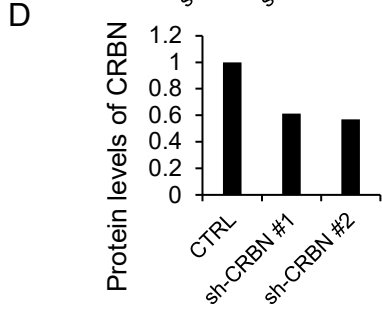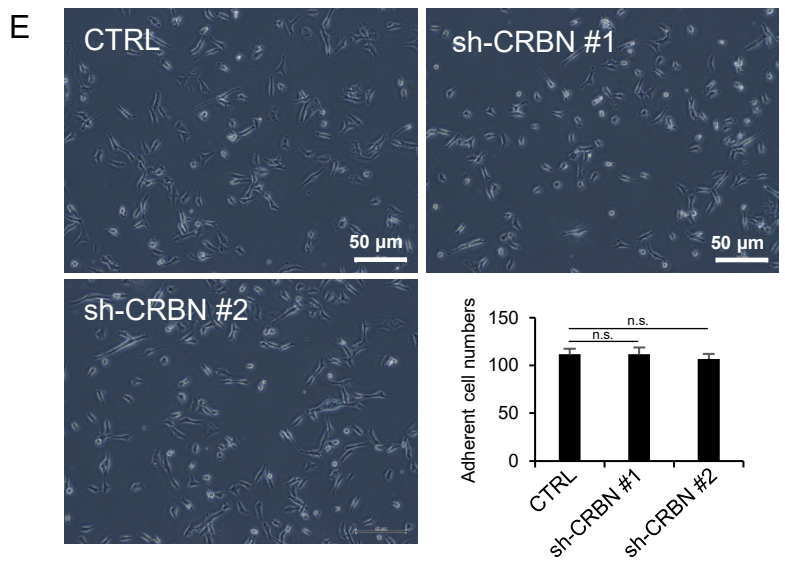

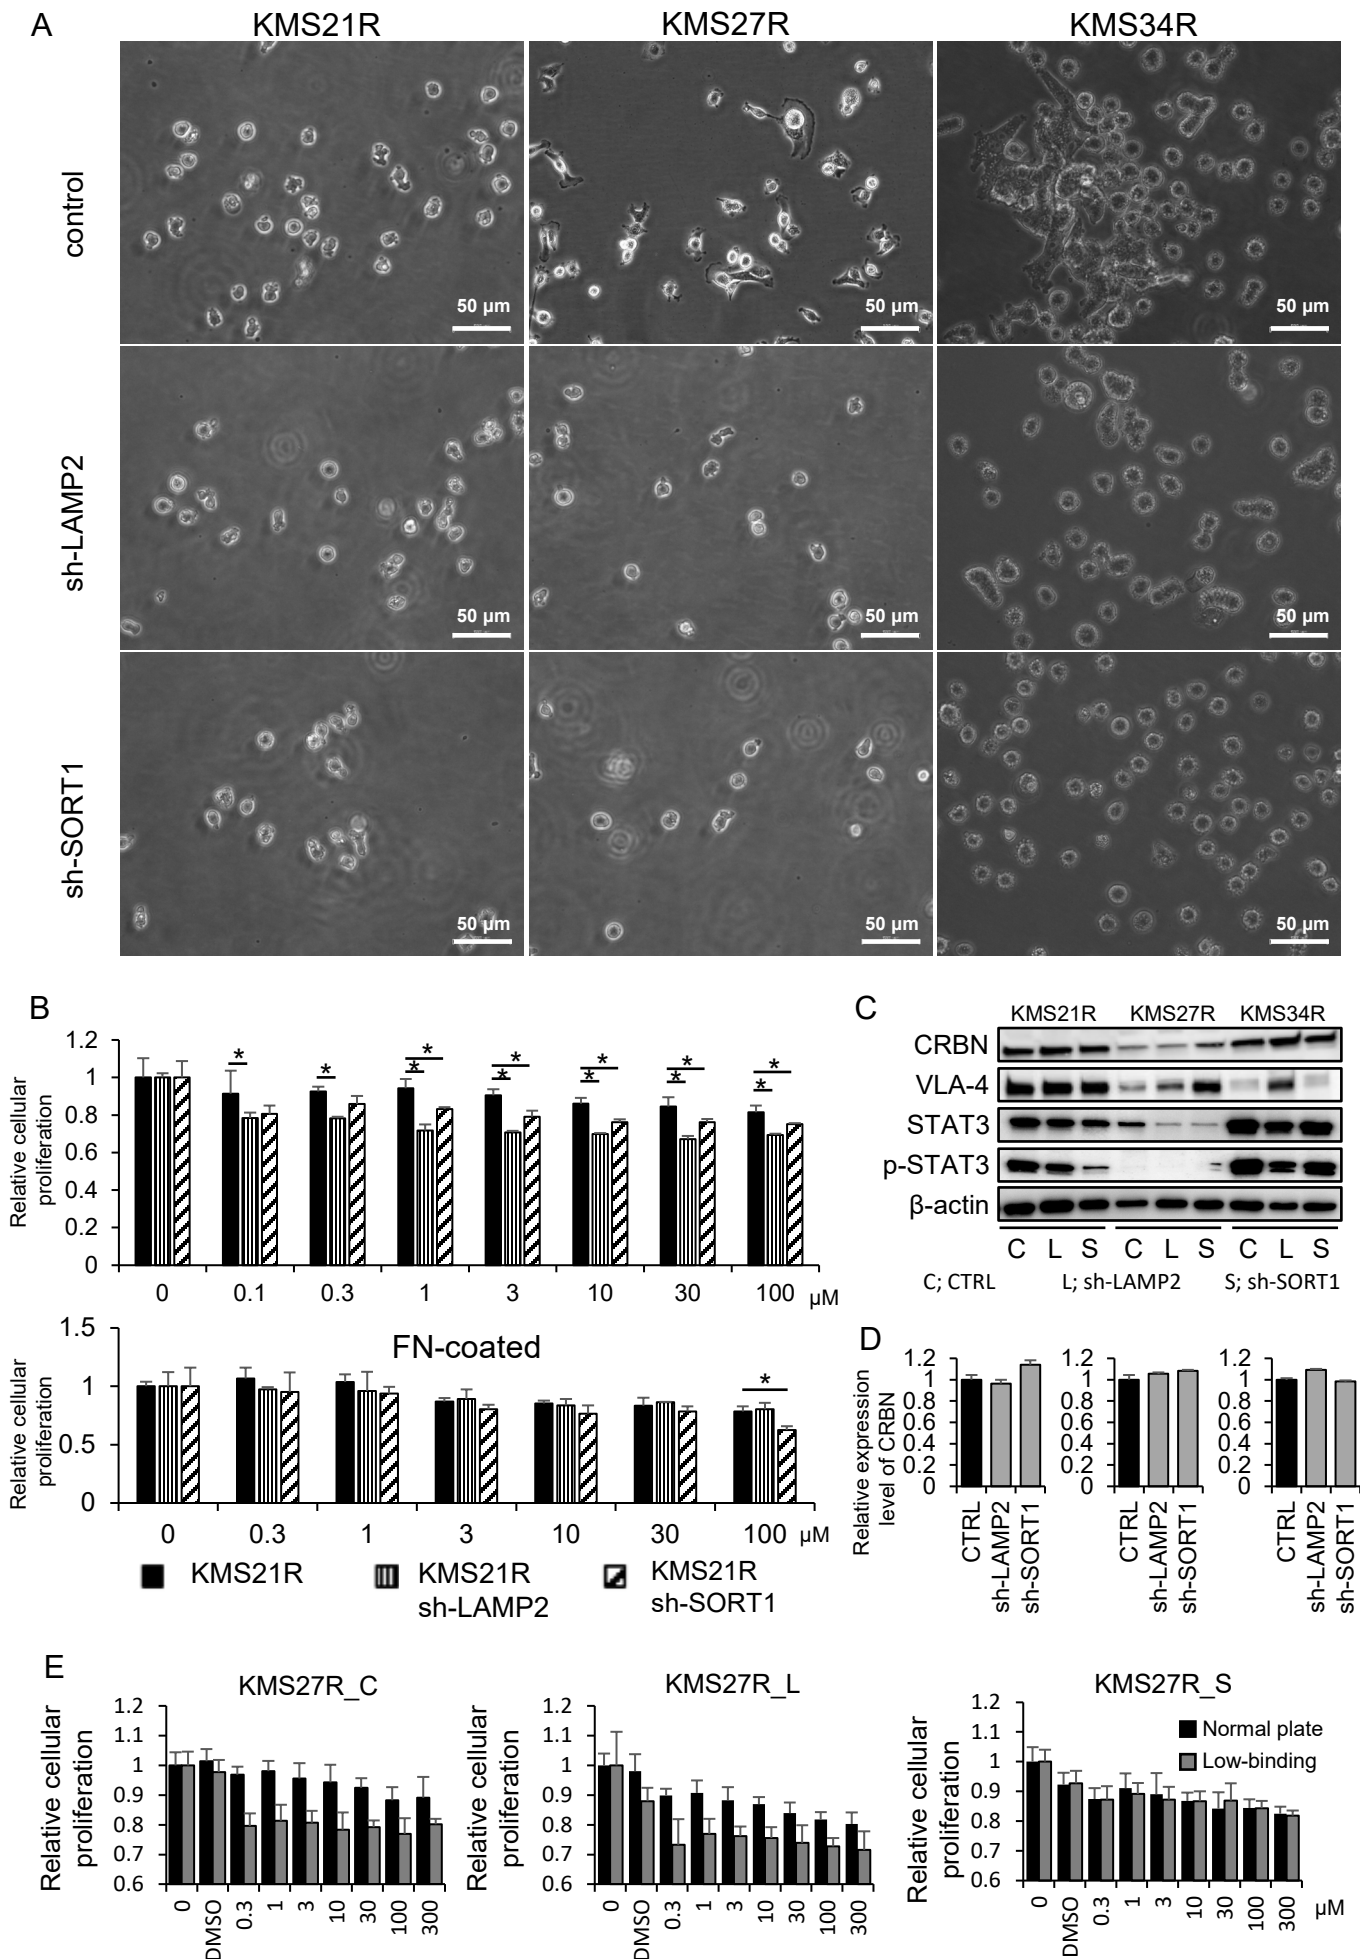

Supplementary Figure 8, Yamamoto T et al.

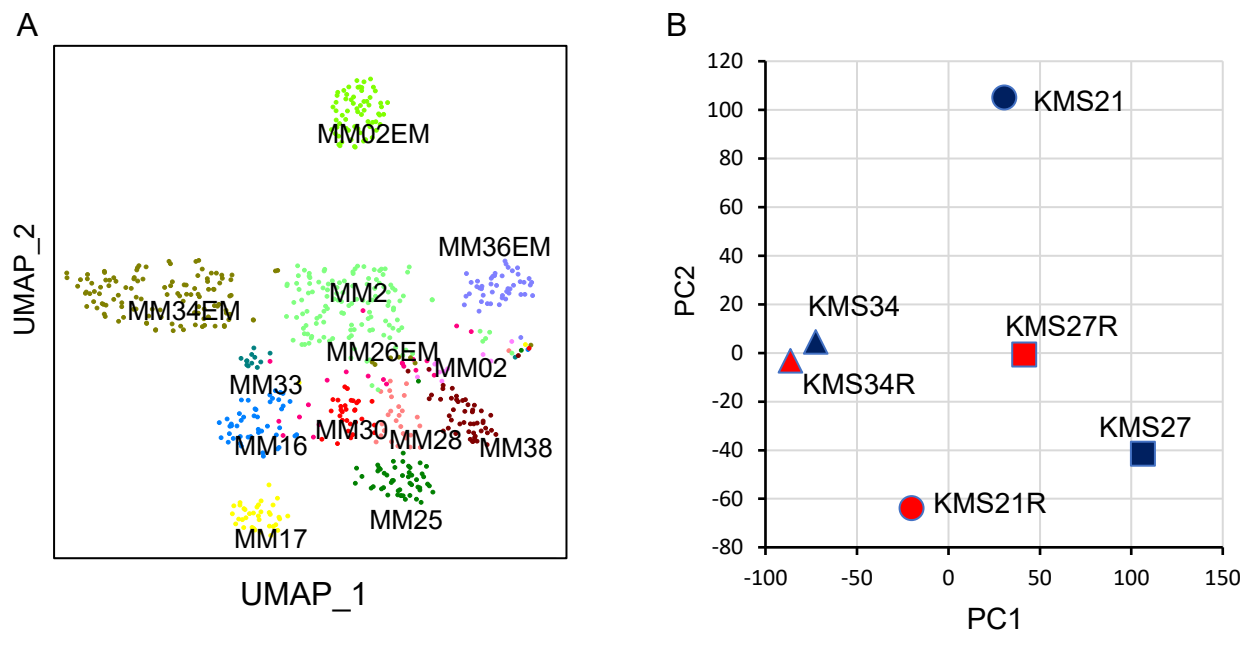

**C**

|                    |                    |          |           |         |          |         |
|--------------------|--------------------|----------|-----------|---------|----------|---------|
| PC1_signature gene | CGB7               | PEG3-AS1 | CELP      | NOS1    | CHL1     |         |
|                    | CLDN22             | PHYHIPL  | ECE2      | DCHS2   | PDE11A   |         |
|                    | CYP2A6             | PKD2L2   | PCNA-AS1  | SLC1A2  | SHC3     |         |
|                    | FUT6               | PLGLA    | OCM       | LAMA3   | GPR26    |         |
|                    | KCNIP4             | RIMS4    | LOC440895 | PTGER3  | PRAMEF14 |         |
|                    | LYPD1              | SPATA22  | USP17L5   | GABRA4  | FBN3     |         |
|                    | NBPF14             | SPRR2B   | GRIN2B    | CR1     | COL6A5   |         |
|                    | OR1E1              | SPRR2E   | TMEM155   | MXRA5   | ADAM12   |         |
|                    | OR2T12             | TP53TG5  | LONRF2    | NCR3    | KCNK10   |         |
|                    | PCDHB8             | TSSK2    | MUC21     | ADAMTS5 | PARVA    |         |
|                    | PC2_signature gene | ITM2C    | EYA2      | TMSB15A | SULF1    | PFKP    |
|                    |                    | CTHRC1   | ITM2A     | CAV1    | JUP      | IGF2BP3 |
|                    |                    | CD9      | PTP4A3    | FGFR3   | FUCA2    | CD44    |
| HES6               |                    | CA2      | GPAT2     | TSPAN7  | RASSF4   |         |
| ANXA1              |                    | PEG10    | CDH2      | TUBB3   | PFN2     |         |
| IDH2               |                    | AHNAK    | TUBB2B    | LRIG1   | DSG2     |         |
| ITGB7              |                    | GPRC5D   | CYB5A     | CLU     | MAF      |         |
| GAS6               |                    | MEST     | PLD4      | TMEM173 | AP1S2    |         |
| MCAM               |                    | AGT      | CST3      | PDLIM1  | PDE3B    |         |
| MARCKSL1           |                    | PTPRCAP  | RCN1      | TIMP2   | SLC16A14 |         |

# Supplementary Figure 9, Yamamoto T et al.

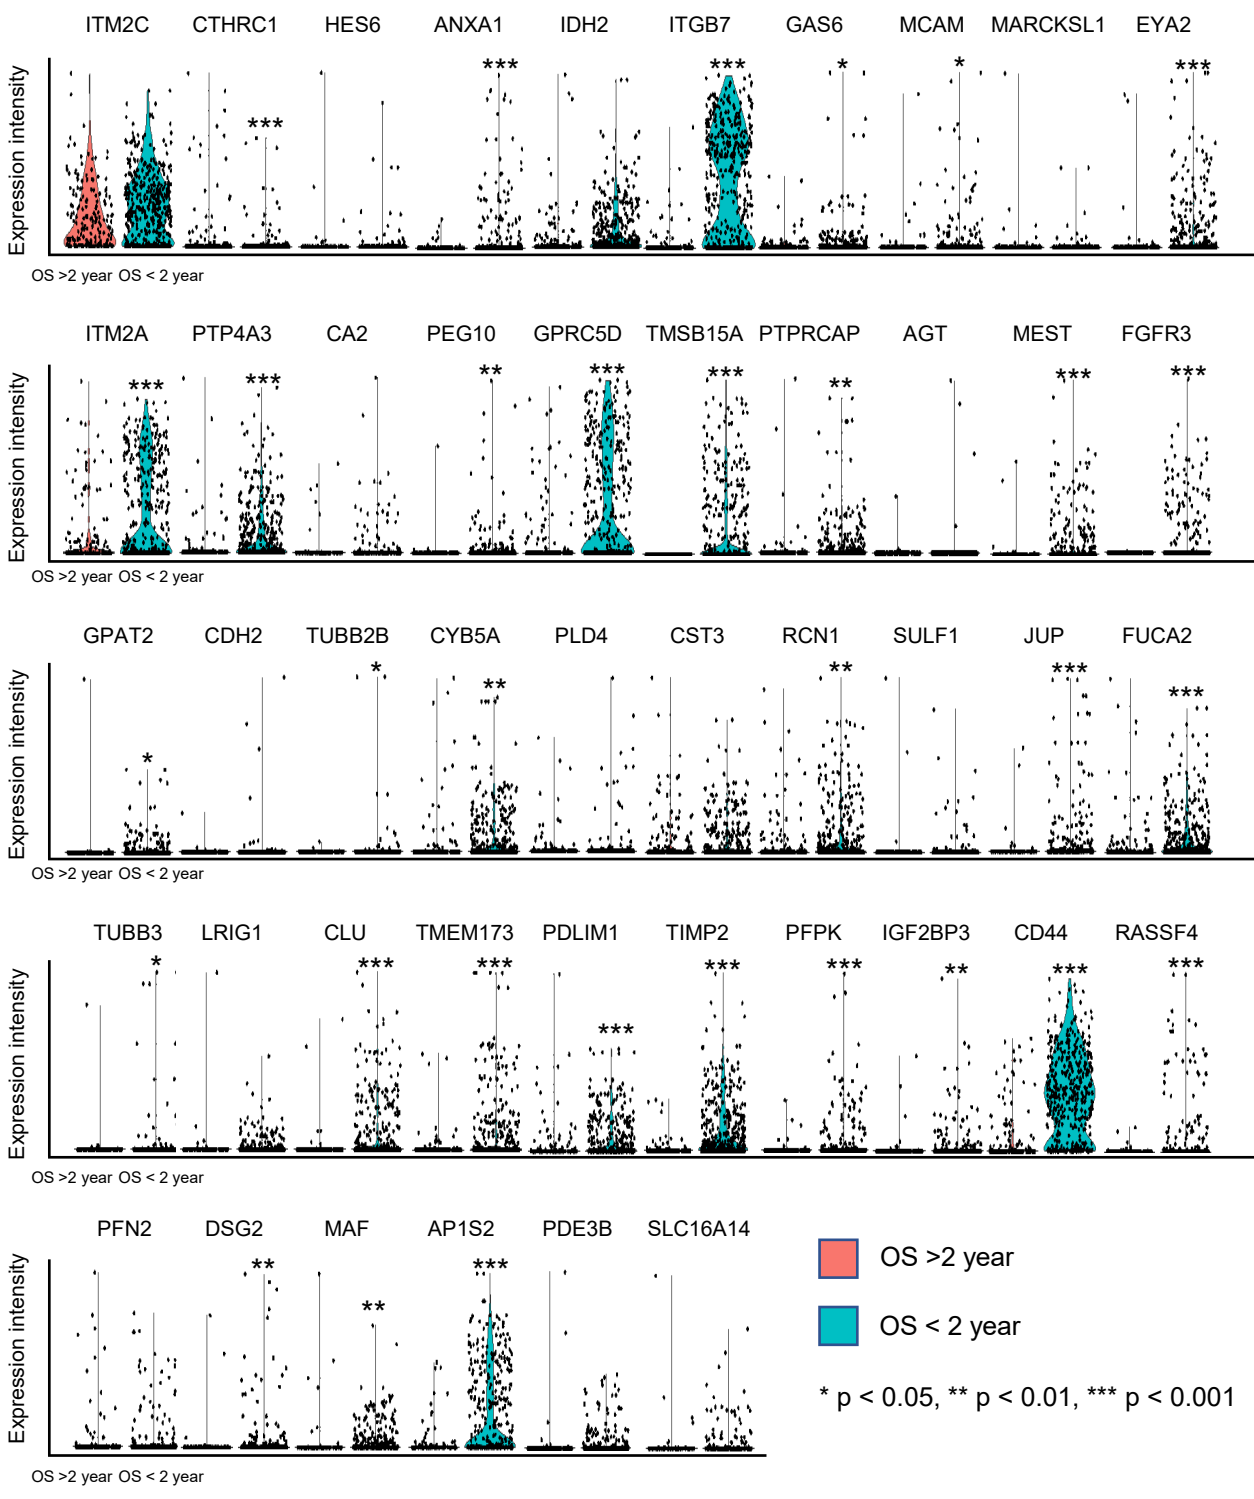

Supplement: advancesADV2021005772-suppl1.pdf [file advancesADV2021005772-suppl1.pdf]
